# Supplementary material
Source: Springer Nature journal article supplement (https://www.springermedizin.de/resource/supplementary/12984_2008_160_MOESM6_ESM.pdf/9605430)

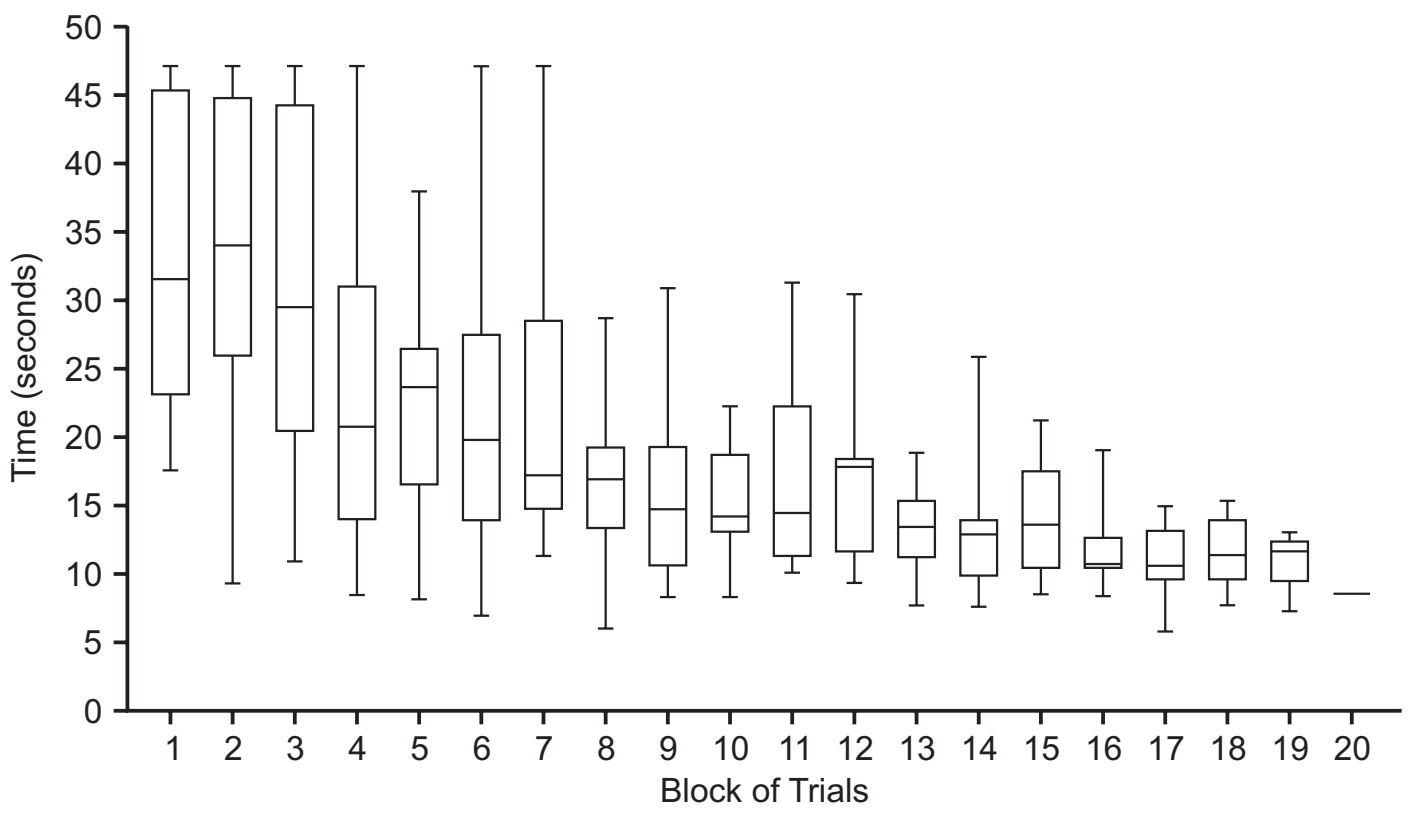

Figure 4 *Röijezon et. al.*

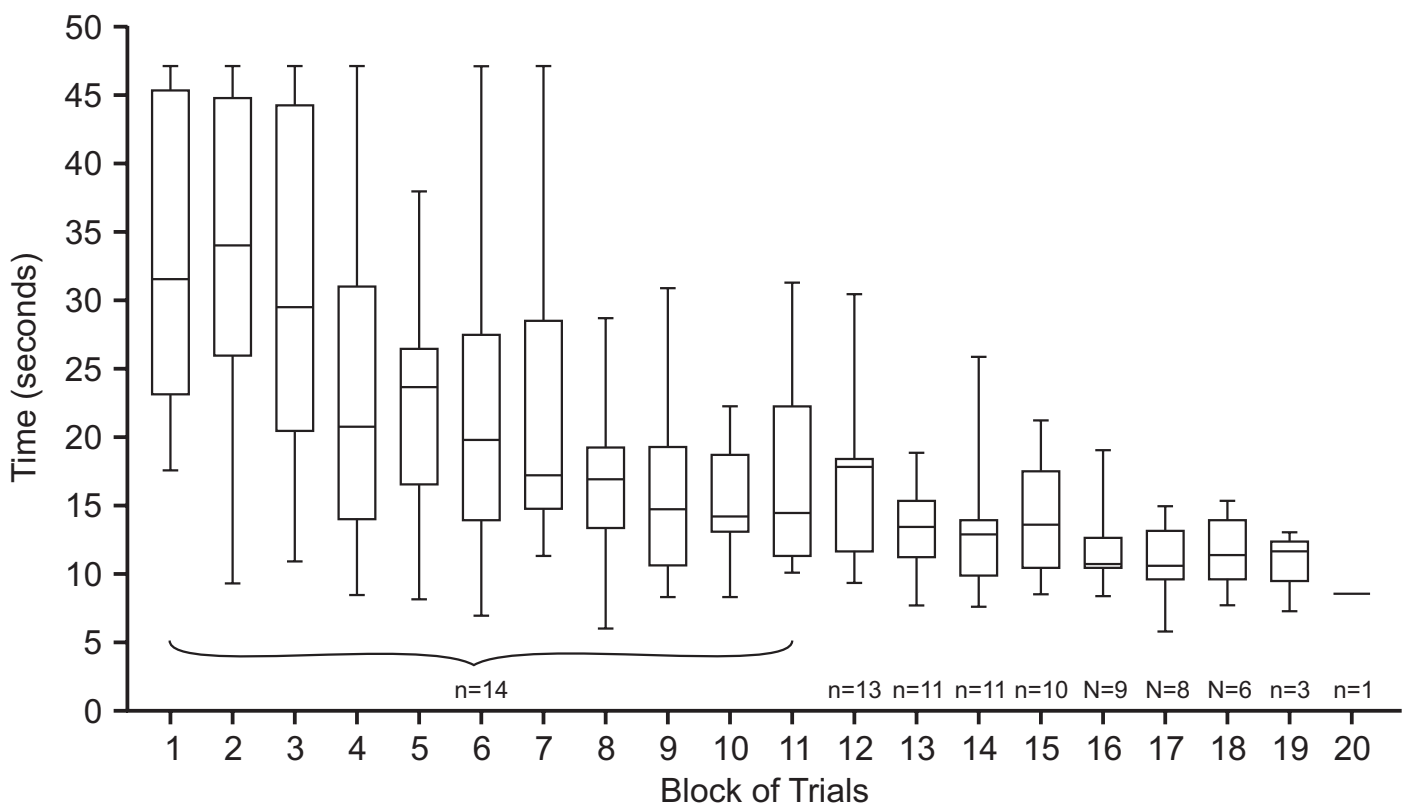

Supplement: MOESM6 [file 9605430]
